# Supplementary material
Source: PubMed Central journal article supplement (PMC7024648)
Supplement: NIHMS1551252-supplement-Supplemental_Table_1.pdf [file NIHMS1551252-supplement-Supplemental_Table_1.pdf]

**Supplemental Table 1 - Candidate study characteristics**

| Study                   |               | Sample         |               | Standardization      |                                                              |         |                         |                   |                                                         | Outcomes                                                                                                                      |                                  |                                   |
|-------------------------|---------------|----------------|---------------|----------------------|--------------------------------------------------------------|---------|-------------------------|-------------------|---------------------------------------------------------|-------------------------------------------------------------------------------------------------------------------------------|----------------------------------|-----------------------------------|
| First Author            | Country       | Age Range (yr) | N Total (M/F) | ATS Guidelines (Y/N) | Deviations from ATS Guidelines [N/Y:summary]                 | # tests | Test # used in analysis | Course Length (m) | Course Location Reported                                | Reference Values Provided                                                                                                     | Predictor Variables              | Reference Equation Provided (Y/N) |
| <b>Pediatric</b>        |               |                |               |                      |                                                              |         |                         |                   |                                                         |                                                                                                                               |                                  |                                   |
| Chen <sup>1</sup>       | Taiwan        | 7-17           | 762 (382/380) | Y                    | N                                                            | 1       | 1                       | 30                | Hallways at schools, validated at hospital              | Normal reference centile charts by height for 6MWD for males and females                                                      | Age, gender, height              | N                                 |
| D'silva <sup>2</sup>    | India         | 7-12           | 400 (202/198) | Y                    | N                                                            | 1       | 1                       | 30                | Internal hallway                                        | Mean $\pm$ SD, and minimum and maximum 6MWD by age, and across age range by gender                                            | -                                | N                                 |
| Gatica <sup>3</sup>     | Chile         | 6-14           | 192 (92/100)  | Y                    | N                                                            | 1       | 1                       | 30                | Closed space, flat surface                              | Normal reference equations (general, and by gender) for 6MWD                                                                  | Age, gender, height, weight, HRR | Y                                 |
| Geiger <sup>4</sup>     | Austria       | 3-18           | 528 (280/248) | Y                    | Y: Measuring wheel used as incentive device; course location | 3       | Best recorded           | 20                | 3 different schools; straight course between flag poles | Mean $\pm$ SD 6MWD by age and gender category, and normal reference equation for 6MWD by gender                               | Age, gender, height              | Y                                 |
| Goemans <sup>5</sup>    | Belgium       | 5-12           | 442 (442/0)   | Y                    | N                                                            | 1       | 1                       | 25                | Flat, straight corridor                                 | Age and height specific centile curves for 6MWD, and modified Geiger et al (2006) normal reference equation for 6MWD in males | Age, height                      | Y                                 |
| Kanburoglu <sup>6</sup> | Turkey        | 12-18          | 949 (482/467) | Y                    | Y: Course location outside                                   | 1       | 1                       | 30                | Asphalt surface of school yards                         | Mean $\pm$ SD 6MWD by age and gender, and normal reference centile charts by age for 6MWD for males and females               | Age, gender                      | N                                 |
| Klepper <sup>7</sup>    | United States | 7-11           | 100 (43/57)   | Y                    | N                                                            | 2       | Best recorded           | 15-25             | 2 school gyms (15m); 1 indoor straight                  | Mean $\pm$ SD 6MWD by age and gender                                                                                          | -                                | N                                 |

|                         |                |      |                   |   |                                                                        |   |               |       |                                                                |                                                                                                                     |                                  |   |
|-------------------------|----------------|------|-------------------|---|------------------------------------------------------------------------|---|---------------|-------|----------------------------------------------------------------|---------------------------------------------------------------------------------------------------------------------|----------------------------------|---|
|                         |                |      |                   |   |                                                                        |   |               |       | hallway<br>(25m)                                               |                                                                                                                     |                                  |   |
| Lammers <sup>8</sup>    | United Kingdom | 4-11 | 328<br>(178/151)  | Y | N                                                                      | 1 | 1             | 30-50 | Flat , hard ground                                             | Mean $\pm$ SD 6MWD by age (pooled gender)                                                                           | Age                              | N |
| Li <sup>9</sup>         | China          | 7-16 | 1445<br>(805/640) | Y | N                                                                      | 1 | 1             | 30    | Internal hallway                                               | Normal reference centile charts by height for 6MWD for males and females                                            | Height, $\Delta$ HR              | Y |
| McKay <sup>10</sup>     | Australia      | 3-19 | 300<br>(150/150)  | Y | N                                                                      | 1 | 1             | 25    | Laboratory (hallway)                                           | Normal reference percentiles for 6MWD by age groups and gender                                                      | Age, gender, height, weight      | N |
| Oliveira <sup>11</sup>  | Brazil         | 6-13 | 161<br>(77/84)    | Y | N                                                                      | 2 | 1             | 22    | Corridors at schools                                           | Normal reference equation for 6MWD by gender                                                                        | Age, gender, height, weight      | Y |
| Priesnitz <sup>12</sup> | Brazil         | 6-12 | 188<br>(92/96)    | Y | N                                                                      | 2 | 1             | 30    | Long, flat corridor at 3 different schools                     | Normal reference equation for 6MWD (pooled gender)                                                                  | Age, height, weight, $\Delta$ HR | Y |
| Rahman <sup>13</sup>    | Saudi Arabia   | 6-11 | 136<br>(0/136)    | Y | N                                                                      | 1 | 1             | 30    | Long, straight, flat enclosed corridor at 10 different schools | Mean $\pm$ SD, and minimum and maximum 6MWD by age                                                                  | Age, height                      | N |
| Roush <sup>14</sup>     | United States  | 7-9  | 76<br>(38/38)     | N | Y: Students tested in groups; straws used to count laps; square course | 2 | Average       | 60    | At 2 different schools on playing fields                       | Normal reference percentiles by age and gender for 6MWD                                                             | -                                | N |
| Saad <sup>15</sup>      | Tunisia        | 6-16 | 200<br>(100/100)  | Y | N                                                                      | 2 | Best recorded | 40    | Seldom traveled, flat, straight, corridor                      | Normal reference equation for 6MWD (pooled age and gender)                                                          | Age, height, weight              | Y |
| Saraff <sup>16</sup>    | Austria        | 4-19 | 696<br>(368/328)  | Y | Y: Measuring wheel used, fitted to child's height; course location     | 1 | 1             | 20    | At schools; between 2 flag poles                               | Normal reference equation for 6MWD by gender, and centile charts for age and height by gender using a modified 6MWT | Age, gender, height              | Y |

|                         |                         |       |                  |   |                                                               |   |               |              |                                                        |                                                                                                          |                                          |   |
|-------------------------|-------------------------|-------|------------------|---|---------------------------------------------------------------|---|---------------|--------------|--------------------------------------------------------|----------------------------------------------------------------------------------------------------------|------------------------------------------|---|
| Tonklang <sup>17</sup>  | Thailand                | 9-12  | 739<br>(403/336) | Y | Y: Students tested in groups; rubber bands used to count laps | 1 | 1             | 30           | Long, flat, straight, hard ground; 5 different schools | Normal reference centile charts by age for 6MWD for males and females                                    | Age, gender, weight, $\Delta$ HR         | N |
| Ulrich <sup>18</sup>    | Switzerland             | 5-17  | 496<br>(244/252) | Y | Y: Course location outside                                    | 1 | 1             | 30           | Flat ground between 2 flag poles                       | Normal reference equations for 6MWD (general, and by age and gender)                                     | Age, height, weight                      | Y |
| Vardhan <sup>19</sup>   | India                   | 7-16  | 460<br>(230/230) | Y | Y: Course location outside                                    | 1 | 1             | 30           | School playgrounds                                     | Mean $\pm$ SD 6MWD by gender and age category                                                            | -                                        | N |
| <b>Adult</b>            |                         |       |                  |   |                                                               |   |               |              |                                                        |                                                                                                          |                                          |   |
| Ajiboye <sup>20</sup>   | Nigeria                 | 21-67 | 422<br>(224/198) | Y | N                                                             | 1 | 1             | 30           | Straight, flat surface of medical gymnasium            | Normal reference equation for 6MWD (combined gender)                                                     | Age, height, weight                      | Y |
| Alameri <sup>21</sup>   | Saudi Arabia            | 18-50 | 248<br>(127/111) | Y | N                                                             | 1 | 1             | 30           | Quiet corridor; 5 sites                                | Normal reference equation for 6MWD (combined gender)                                                     | Age, height                              | Y |
| Britto <sup>22</sup>    | Brazil                  | 19-79 | 617<br>(296/321) | Y | N                                                             | 2 | Best recorded | 30           | Corridor, 4 study sites                                | Normal reference equation for 6MWD                                                                       | Age, gender, height, $\Delta$ HR         | Y |
| Camarri <sup>23</sup>   | Australia               | 55-75 | 70<br>(33/37)    | N | -                                                             | 3 | Best recorded | 45           | Long straight course, enclosed level corridor          | (2) Normal reference equations for 6MWD [height and FEV1 (recommended), and height, weight, age, gender] | Height, FEV1                             | Y |
| Casanova <sup>24</sup>  | Multi-site, 7 countries | 40-80 | 444<br>(238/206) | Y | N                                                             | 2 | Best recorded | Not reported | Not reported                                           | Normal reference equation for 6MWD and age-based reference curves by gender for 6MWD                     | Age, gender, height, weight, $\Delta$ HR | Y |
| Chetta <sup>25</sup>    | Italy                   | 20-50 | 102<br>(48/54)   | Y | N                                                             | 2 | 1             | 30           | Undisturbed, indoor, level, hospital corridor          | Normal reference equation for 6MWD                                                                       | Age, gender, height                      | Y |
| Enright <sup>26</sup>   | United States           | 40-80 | 290<br>(117/173) | N | -                                                             | 1 | 1             | 30           | Hallway                                                | Normal reference equation for 6MWD                                                                       | Age, gender, height, weight              | Y |
| Fernandes <sup>27</sup> | West India              | 25-75 | 169<br>(80/89)   | Y | N                                                             | 1 | 1             | 30           | Undisturbed, straight corridor                         | Normal reference equation for 6MWD                                                                       | Age, gender                              | Y |

|                                 |            |       |                  |   |   |   |                            |    |                                                 |                                                                |                             |   |
|---------------------------------|------------|-------|------------------|---|---|---|----------------------------|----|-------------------------------------------------|----------------------------------------------------------------|-----------------------------|---|
| Gibbons <sup>28</sup>           | Canada     | 22-79 | 79<br>(41/38)    | N | - | 4 | Best recorded              | 20 | Undisturbed, indoor, level, hospital corridor   | Normal reference equation for 6MWD                             | Age, gender                 | Y |
| Hill <sup>29</sup>              | Canada     | 45-85 | 77<br>(37/40)    | Y | N | 3 | Best of first two recorded | 30 | Level, enclosed corridor                        | Normal reference equation for 6MWD                             | Age, gender                 | Y |
| Iwama <sup>30</sup>             | Brazil     | 13-84 | 134<br>(61/73)   | Y | N | 2 | 2                          | 30 | Indoor hospital corridor                        | Normal reference equation for 6MWD                             | Age, gender                 | Y |
| Jenkins <sup>31</sup>           | Australia  | 45-85 | 109<br>(48/61)   | Y | N | 2 | Best recorded              | 45 | Straight course, enclosed corridor              | Normal reference equation for 6MWD                             | Age, gender, height         | Y |
| Kim <sup>32</sup>               | Korea      | 22-59 | 259<br>(95/164)  | Y | N | 2 | Best recorded              | 30 | Long hospital corridor                          | Normal reference equation for 6MWD                             | Age, gender, height         | Y |
| McKay <sup>10</sup>             | Australia  | 20-59 | 400<br>(200/200) | Y | N | 1 | 1                          | 25 | Laboratory (hallway)                            | Normal reference percentiles by age groups and gender for 6MWD | Age, gender, height, weight | N |
| Mosharraf-Hossain <sup>33</sup> | Bangladesh | 25-55 | 190<br>(137/53)  | Y | N | 1 | 1                          | 13 | Not reported                                    | Mean $\pm$ SD 6MWD by gender                                   | -                           | N |
| Nusdwinuringtyas <sup>34</sup>  | Indonesia  | 18-50 | 123<br>(58/65)   | N | - | 2 | 1                          | 15 | Laboratory                                      | Normal reference equation for 6MWD                             | Age, gender, height, weight | Y |
| Osses <sup>35</sup>             | Chile      | 20-80 | 175<br>(77/98)   | Y | N | 2 | Best recorded              | 30 | Two laboratory sites; long, inside corridors    | Normal reference equation for 6MWD                             | Age, gender, height, weight | Y |
| Ozasa <sup>36</sup>             | Japan      | 40-79 | 97<br>(34/63)    | Y | N | 2 | Best recorded              | 30 | Straight, indoor track                          | Normal reference equation for 6MWD                             | Age, height, WC, FEV1       | Y |
| Palaniappan <sup>37</sup>       | India      | 25-80 | 125<br>(58/67)   | Y | N | 1 | 1                          | 30 | Indoor hospital corridor                        | Normal reference equation for 6MWD                             | Age, gender, height, weight | Y |
| Rao <sup>38</sup>               | Pakistan   | 15-65 | 296<br>(211/85)  | Y | N | 1 | 1                          | 18 | Flat, straight, well-lit, marked, hard corridor | Normal reference equation for 6MWD                             | Age, gender, height         | Y |

|                         |         |       |                  |   |   |   |                  |    |                                                                   |                                                            |                                      |   |
|-------------------------|---------|-------|------------------|---|---|---|------------------|----|-------------------------------------------------------------------|------------------------------------------------------------|--------------------------------------|---|
| Saad <sup>39</sup>      | Tunisia | 40-85 | 229<br>(104/125) | Y | N | 2 | Best<br>recorded | 40 | Seldom-<br>traveled, flat,<br>straight<br>corridor                | Normal reference<br>equation for 6MWD                      | Age,<br>gender,<br>height,<br>weight | Y |
| Shrestha <sup>40</sup>  | Nepal   | 18-81 | 250<br>(166/76)  | Y | N | 1 | 1                | 30 | Long, flat,<br>straight<br>corridor in an<br>outpatient<br>center | Normal reference<br>equation for 6MWD                      | Age,<br>gender,<br>weight            | Y |
| Soares <sup>41</sup>    | Brazil  | 20-80 | 132<br>(66/66)   | Y | N | 3 | Best<br>recorded | 30 | Level,<br>outdoor<br>corridor free<br>of foot traffic             | Normal reference<br>equation for 6MWD<br>(combined gender) | Age,<br>height,<br>BMI               | Y |
| Troosters <sup>42</sup> | Belgium | 50-85 | 51<br>(29/22)    | Y | N | 2 | Best<br>recorded | 50 | Long hospital<br>corridor                                         | Normal reference<br>equation for 6MWD                      | Age,<br>gender,<br>height,<br>weight | Y |
| Tsang <sup>43</sup>     | China   | 21-70 | 548<br>(226/322) | Y | N | 2 | 1                | 15 | Hallways at<br>22 hospital<br>sites                               | Mean $\pm$ SD 6MWD by<br>gender and age category           | -                                    | N |
| Vaish <sup>44</sup>     | India   | 40-60 | 101<br>(101/0)   | Y | N | 1 | 1                | 30 | Indoor, level<br>hospital<br>corridor                             | Normal reference<br>equation for 6MWD for<br>males         | Age,<br>height                       | Y |
| Zou <sup>45</sup>       | China   | 18-30 | 355<br>(179/176) | Y | N | 2 | Best<br>recorded | 30 | Straight,<br>long, flat,<br>enclosed<br>corridor                  | Normal reference<br>equation for 6MWD                      | Gender,<br>height,<br>$\Delta$ HR    | Y |
| Zou <sup>46</sup>       | China   | 18-59 | 643<br>(324/319) | Y | N | 2 | Best<br>recorded | 30 | Straight,<br>long, flat,<br>enclosed<br>corridor                  | Normal reference<br>equation for 6MWD                      | Age,<br>gender,<br>height            | Y |

ATS, American Thoracic Society; 6MWD, six-minute walk test distance; HRR, heart rate reserve;  $\Delta$ HR, change in heart rate; FEV1, forced expiratory volume in 1 second; WC, waist circumference

## SUPPLEMENTAL REFERENCES

1. Chen C-A, Chang C-H, Lin M-T, Hua Y-C, Fang W-Q, Wu M-H, Lue H-C, Wang J-K. Six-minute walking test: normal reference values for Taiwanese children and adolescents. *Acta Cardiologica Sinica* 2015;31(3):193.
2. D'silva C, Vaishali K, Venkatesan P. Six-minute walk test-normal values of school children aged 7–12 y in India: a cross-sectional study. *The Indian Journal of Pediatrics* 2012;79(5):597-601.
3. Gatica D, Puppo H, Villarroel G, San Martín I, Lagos R, Montecino JJ, Lara C, Zenteno D. Valores de referencia del test de marcha de seis minutos en niños sanos. *Revista médica de Chile* 2012;140(8):1014-1021.

4. Geiger R, Strasak A, Trembl B, Gasser K, Kleinsasser A, Fischer V, Geiger H, Loeckinger A, Stein JI. Six-minute walk test in children and adolescents. *The Journal of pediatrics* 2007;150(4):395-399. e392.
5. Goemans N, Klingels K, Van den Hauwe M, Boons S, Verstraete L, Peeters C, Feys H, Buyse G. Six-Minute Walk Test: Reference Values and Prediction Equation in Healthy Boys Aged 5 to 12 Years. *PLoS One* 2013;8(12):e84120.
6. Kanburoglu MK, Ozdemir FM, Ozkan S, Tunaoglu FS. Reference Values of the 6-Min Walk Test in Healthy Turkish Children and Adolescents Between 11 and 18 Years of Age. *Respiratory care* 2014;resp. 02891.
7. Klepper SE, Muir N. Reference values on the 6-minute walk test for children living in the United States. *Pediatric Physical Therapy* 2011;23(1):32-40.
8. Lammers AE, Hislop AA, Flynn Y, Haworth SG. The 6-minute walk test: normal values for children of 4–11 years of age. *Archives of disease in childhood* 2008;93(6):464-468.
9. Li AM, Yin J, Au JT, So HK, Tsang T, Wong E, Fok TF, Ng PC. Standard reference for the six-minute-walk test in healthy children aged 7 to 16 years. *American Journal of Respiratory and Critical Care Medicine* 2007;176(2):174-180.
10. McKay MJ, Baldwin JN, Ferreira P, Simic M, Vanicek N, Burns J, Baldwin J, McKay M, Nightingale E, Pourkazemi F. Reference values for developing responsive functional outcome measures across the lifespan. *Neurology* 2017;88(16):1512-1519.
11. Oliveira AC, Rodrigues CC, Rolim DS, Souza AA, Nascimento OA, Jardim JR, Rozov T. Six-minute walk test in healthy children: Is the leg length important? *Pediatric pulmonology* 2013;48(9):921-926.
12. Priesnitz CV, Rodrigues GH, da Silva Stumpf C, Viapiana G, Cabral CP, Stein RT, Marostica PJC, Donadio MVF. Reference values for the 6-min walk test in healthy children aged 6–12 years. *Pediatric pulmonology* 2009;44(12):1174-1179.
13. Rahman SAA, Alnegimshi AA. Normative values of six-minute walk distance for healthy Saudi girls. *World Appl Sci J* 2014;32(8):1721-1730.
14. Roush J, Guy J, Purvis M. Reference values and relationship of the six minute walk test and body mass index in healthy third grade school children. *Internet Journal of Allied Health Sciences and Practice* 2006;4(3):3.
15. Saad HB, Prefaut C, Missaoui R, Mohamed IH, Tabka Z, Hayot M. Reference equation for 6-min walk distance in healthy North African children 6–16 years old. *Pediatric pulmonology* 2009;44(4):316-324.
16. Saraff V, Schneider J, Colleselli V, Ruepp M, Rauchenzauner M, Neururer S, Geiger R, Högler W. Sex-, age-, and height-specific reference curves for the 6-min walk test in healthy children and adolescents. *European journal of pediatrics* 2015;174(6):837-840.
17. Tonklang N, Roymanee S, Sopontammarak S. Developing standard reference data for Thai children from a six-minute walk test. *Journal of the Medical Association of Thailand* 2011;94(4):470.
18. Ulrich S, Hildenbrand FF, Treder U, Fischler M, Keusch S, Speich R, Fasnacht M. Reference values for the 6-minute walk test in healthy children and adolescents in Switzerland. *BMC pulmonary medicine* 2013;13(1):49.
19. Vardhan V. Standard Normative Values of Six Minute Walk Test in Healthy Children Aged 7–16 Years a Cross Sectional Study. *Indian Journal of Physiotherapy and Occupational Therapy-An International Journal* 2015;9(2):214-219.
20. Ajiboye OA, Anigbogu CN, Ajuluchukwu JN, Jaja SI. Prediction equations for 6-minute walk distance in apparently healthy Nigerians. *Hong Kong Physiotherapy Journal* 2014;32(2):65-72.
21. Alameri H, Al-Majed S, Al-Howaikan A. Six-min walk test in a healthy adult Arab population. *Respiratory Medicine* 2009;103(7):1041-1046.
22. Britto RR, Probst VS, de Andrade AFD, Samora GAR, Hernandez NA, Marinho PEM, Karsten M, Pitta F, Parreira VF. Reference equations for the six-minute walk distance based on a Brazilian multicenter study. *Braz J Phys Ther* 2013;17(6):556-563.
23. Camarri B, Eastwood PR, Cecins NM, Thompson PJ, Jenkins S. Six minute walk distance in healthy subjects aged 55–75 years. *Respiratory Medicine* 2006;100(4):658-665.
24. Casanova C, Celli B, Barria P, Casas A, Cote C, De Torres J, Jardim J, Lopez M, Marin J, De Oca MM. The 6-min walk distance in healthy subjects: reference standards from seven countries. *European Respiratory Journal* 2011;37(1):150-156.

25. Chetta A, Zanini A, Pisi G, Aiello M, Tzani P, Neri M, Olivieri D. Reference values for the 6-min walk test in healthy subjects 20–50 years old. *Respiratory medicine* 2006;100(9):1573-1578.
26. Enright PL, Sherrill DL. Reference equations for the six-minute walk in healthy adults. *American journal of respiratory and critical care medicine* 1998;158(5):1384-1387.
27. Fernandes L, Mesquita AM, Vadala R, Dias A. Reference equation for six minute walk test in healthy western India population. *Journal of clinical and diagnostic research: JCDR* 2016;10(5):CC01.
28. Gibbons WJ, Fruchter N, Sloan S, Levy RD. Reference values for a multiple repetition 6-minute walk test in healthy adults older than 20 years. *Journal of Cardiopulmonary Rehabilitation and Prevention* 2001;21(2):87-93.
29. Hill K, Wickerson LM, Woon LJ, Abady AH, Overend TJ, Goldstein RS, Brooks D. The 6-min walk test: Responses in healthy Canadians aged 45 to 85 years. *Applied Physiology, Nutrition and Metabolism* 2011;36(5):643-649.
30. Iwama AM, Andrade GN, Shima P, Tanni SE, Godoy I, Dourado VZ. The six-minute walk test and body weight-walk distance product in healthy Brazilian subjects. *Brazilian Journal of Medical and Biological Research* 2009;42:1080-1085.
31. Jenkins S, Cecins N, Camarri B, Williams C, Thompson P, Eastwood P. Regression equations to predict 6-minute walk distance in middle-aged and elderly adults. *Physiotherapy Theory & Practice* 2009;25(7):516-522.
32. Kim AL, Kwon JC, Park I, Kim JN, Kim JM, Jeong BN, Yu SK, Lee BK, Kim YJ. Reference equations for the six-minute walk distance in healthy Korean adults, aged 22-59 years. *Tuberc Respir Dis (Seoul)* 2014;76(6):269-275.
33. Mosharraf-Hossain AKM, Chakraborty R. Reference values of 6 minutes walk test (6 MWT) in Bangladeshi healthy subjects aged 25-55 years. *Bangladesh Medical Research Council bulletin* 2014;40(2):70-73.
34. Nusdwinuringtyas N, Widjajalaksmi, Yunus F, Alwi I. Reference equation for prediction of a total distance during six-minute walk test using Indonesian anthropometrics. *Acta medica Indonesiana* 2014;46(2):90-96.
35. Osses AR, Yanez VJ, Barria PP, Palacios MS, Dreyse DJ, Diaz PO, Lisboa BC. [Reference values for the 6-minutes walking test in healthy subjects 20-80 years old]. *Rev Med Chil* 2010;138(9):1124-1130.
36. Ozasa N, Morimoto T, Furukawa Y, Hamazaki H, Kita T, Kimura T. Six-Minute Walk Distance in Healthy Japanese Adults. *General Medicine* 2010;11(1):25-30.
37. Palaniappan Ramanathan R, Chandrasekaran B. Reference equations for 6-min walk test in healthy Indian subjects (25-80 years). *Lung India : official organ of Indian Chest Society* 2014;31(1):35-38.
38. Rao NA, Irfan M, Haque AS, Sarwar Zubairi AB, Awan S. Six-minute walk test performance in healthy adult Pakistani volunteers. *Journal of the College of Physicians and Surgeons--Pakistan : JCPSP* 2013;23(10):720-725.
39. Saad HB, Prefaut C, Tabka Z, Hadj Mtir A, Chemit M, Hassaoune R, Ben Abid T, Zara K, Mercier G, Zbidi A, Hayot M. 6-Minute walk distance in healthy North Africans older than 40 years: Influence of parity. *Respiratory Medicine* 2009;103(1):74-84.
40. Shrestha SK, Srivastava B. Six Minute Walk Distance and Reference Equations in Normal Healthy Subjects of Nepal. *Kathmandu University medical journal (KUMJ)* 2015;13(50):97-101.
41. Soares MR, Pereira CAD. Six-minute walk test: reference values for healthy adults in Brazil. *Jornal brasileiro de pneumologia*;37(5):576-583.
42. Troosters T, Gosselink R, Decramer M. Six minute walking distance in healthy elderly subjects. *European Respiratory Journal* 1999;14(2):270.
43. Tsang RCC. Reference Values for 6-Minute Walk Test and Hand-Grip Strength in Healthy Hong Kong Chinese Adults. *Hong Kong Physiotherapy Journal* 2005;23(1):6-12.
44. Vaish H, Ahmed F, Singla R, Shukla DK. Reference equation for the 6-minute walk test in healthy North Indian adult males. *International Journal of Tuberculosis and Lung Disease* 2013;17(5):698-703.
45. Zou H, Zhang J, Chen X, Wang Y, Lin W, Lin J, Chen H, Pan J. Reference Equations for the Six-Minute Walk Distance in the Healthy Chinese Han Population, Aged 18-30 Years. *BMC Pulm Med* 2017;17(1):119.

46. Zou H, Zhu X, Zhang J, Wang Y, Wu X, Liu F, Xie X, Chen X. Reference equations for the six-minute walk distance in the healthy Chinese population aged 18–59 years. *PLoS One* 2017;12(9).
